# Supplementary material for: Spatial control of lipid droplet proteins by the ERAD ubiquitin ligase Doa10
Source: PubMed Central journal article supplement (PMC4969576; doi:10.15252/embj.201593106), 2016-06-29
Supplement: EMBJ-35-1644-s001.pdf [file EMBJ-35-1644-s001.pdf]

## Expanded View Figures

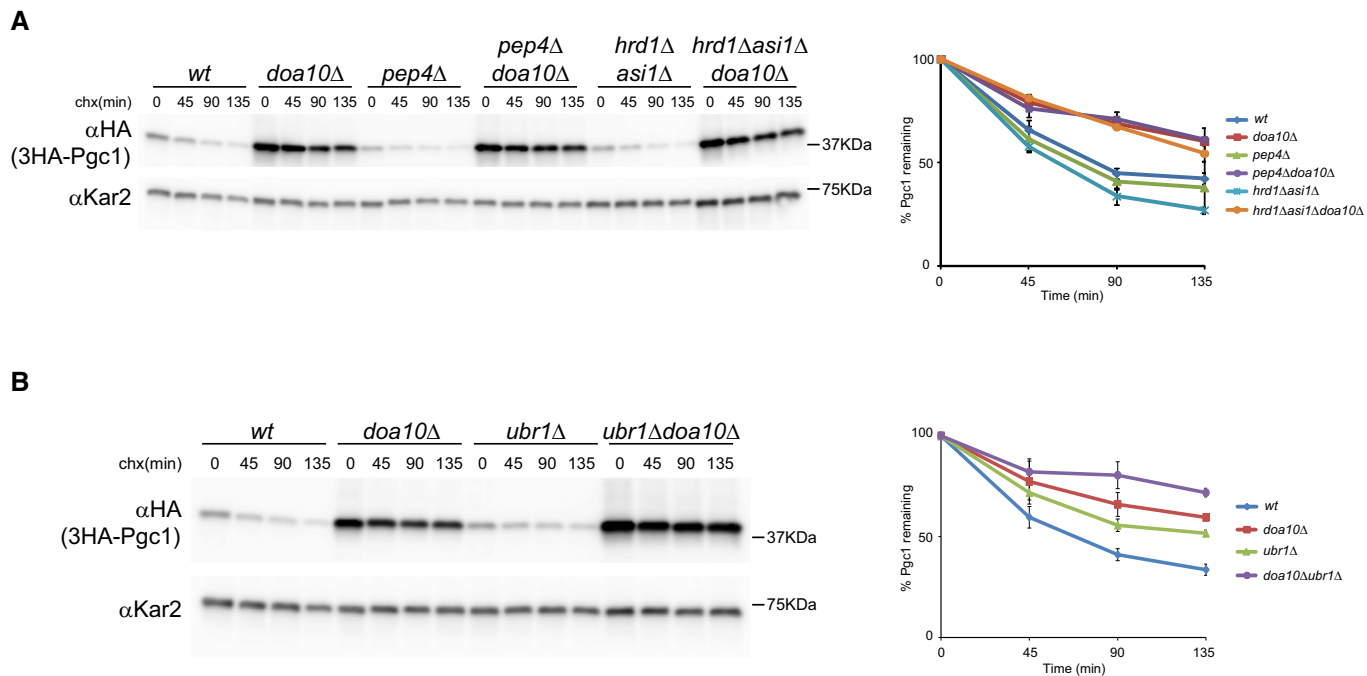

**Figure EV1. Pgc1 degradation is independent of the vacuolar protease Pep4 but requires Doa10 and the cytoplasmic ubiquitin ligase Ubr1.**

A, B The degradation of 3HA-Pgc1 was analyzed in cells with the indicated genotype as described in Fig 1A. The graphs show the average of two independent experiments; error bars represent the standard deviation.

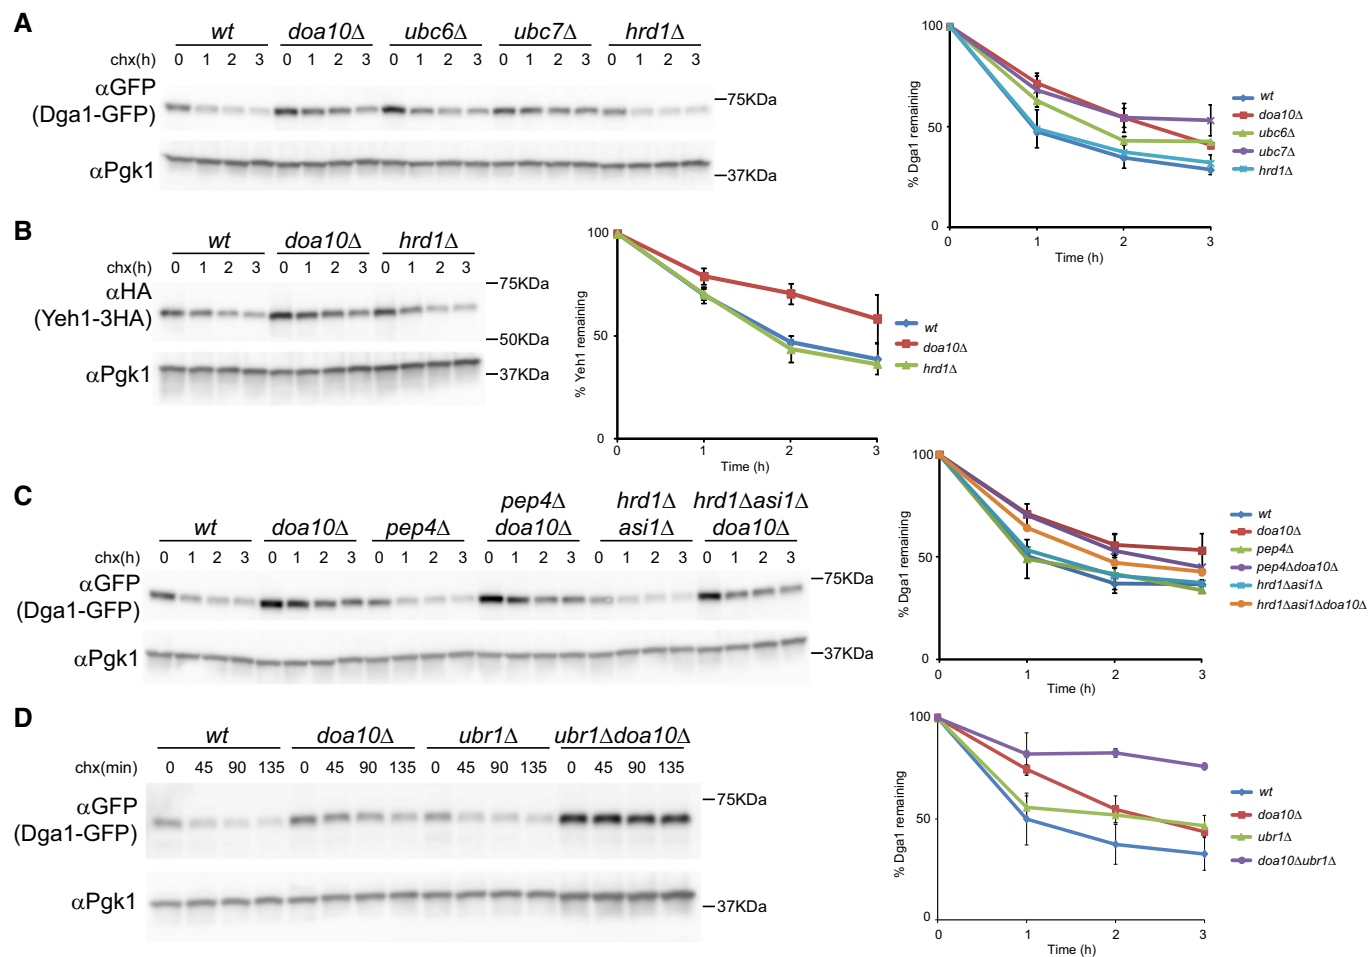

**Figure EV2. The LD proteins Dga1 and Yeh1 are degraded by the ERAD ubiquitin ligase Doa10.**

- A The degradation of Dga1-GFP was analyzed in cells with the indicated genotype as described in Fig 1A. A plasmid-borne GFP-Dga1 expressed from the constitutive *ADH1* promoter was used. The graph shows the average of two independent experiments; error bars represent the standard deviation.
- B The degradation of Yeh1-3HA was analyzed in cells with the indicated genotype as described in Fig 1A. A plasmid-borne Yeh1-3HA expressed from the endogenous promoter was used. The graph shows the average of two independent experiments; error bars represent the standard deviation.
- C, D The degradation of Dga1-GFP was analyzed in cells with the indicated genotype as described in Fig 1A. The graphs show the average of two independent experiments; error bars represent the standard deviation.

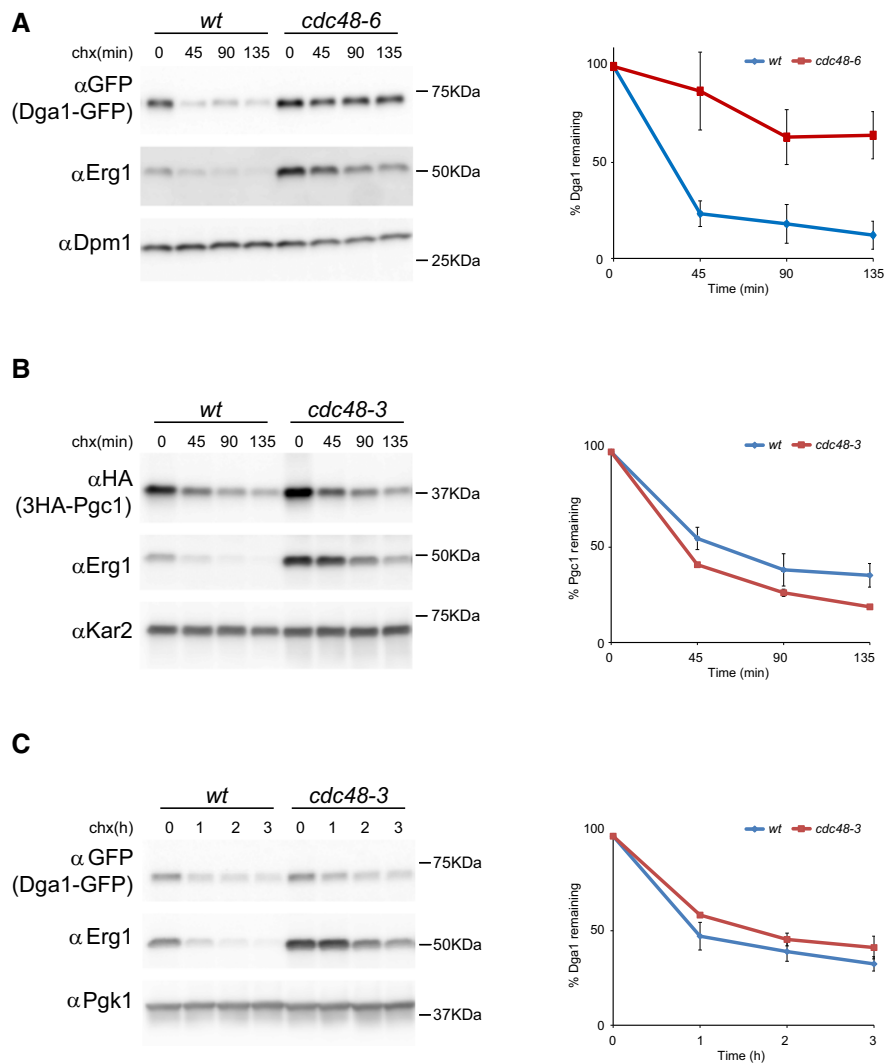

**Figure EV3. Degradation of Pgc1 and Dga1 in *cdc48* mutant cells.**

A The degradation of Dga1-GFP in temperature-sensitive *cdc48-6* mutant cells was analyzed as in Fig 1C. The graph shows the average of three independent experiments; error bars represent the standard deviation.

B, C The degradation of 3HA-Pgc1 and Dga1-GFP in temperature-sensitive *cdc48-3* mutant cells was analyzed as described in Fig 1C. The graphs show the average of two independent experiments; error bars represent the standard deviation.

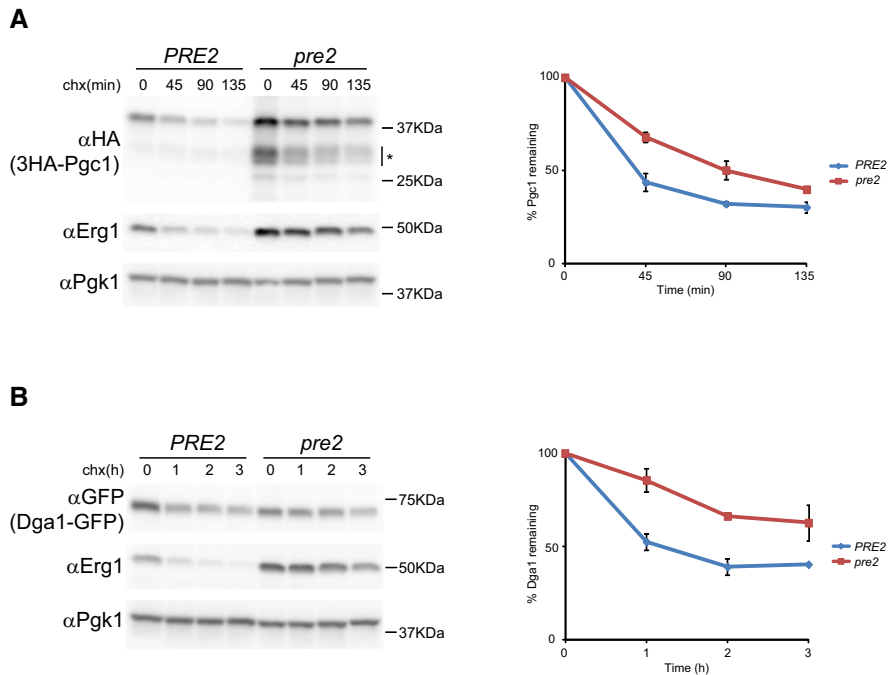

**Figure EV4. Pgc1 and Dga1 are degraded by the proteasome.**

A The degradation of 3HA-Pgc1 was analyzed in proteasome-deficient (*pre2*) and wt control (*PRE2*) cells as described in Fig 1A. Asterisk indicates degradation products accumulating in proteasome-deficient cells. The graph shows the average of two independent experiments; error bars represent the standard deviation.

B The degradation of Dga1-GFP was analyzed in proteasome-deficient (*pre2*) and wt control (*PRE2*) cells as in Fig 1A. The graph shows the average of two independent experiments; error bars represent the standard deviation.

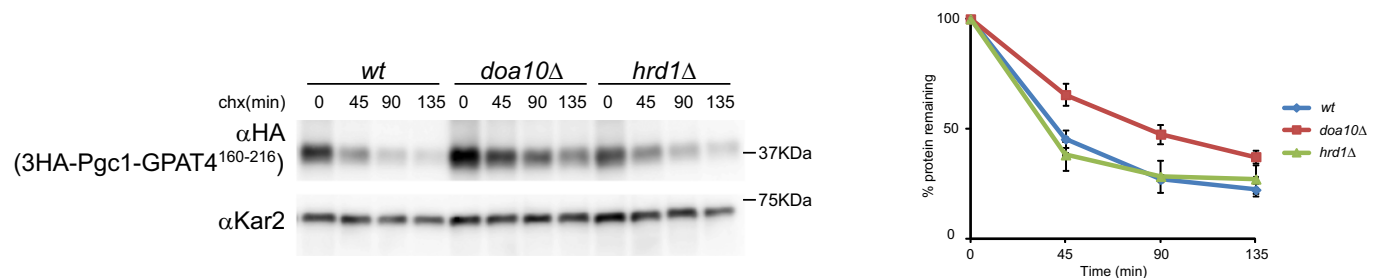

**Figure EV5. The chimeric protein 3HA-Pgc1-GPAT<sup>160-216</sup> is a Doa10 substrate.**

The degradation of 3HA-Pgc1-GPAT<sup>160-216</sup> was analyzed in cells with the indicated genotype as in Fig 1A. The graph shows the average of three independent experiments; error bars represent the standard deviation.
