# Supplementary material for: Spatial control of lipid droplet proteins by the ERAD ubiquitin ligase Doa10
Source: PubMed Central journal article supplement (PMC4969576; doi:10.15252/embj.201593106), 2016-06-29
Supplement: EMBJ-35-1644-s002.pdf [file EMBJ-35-1644-s002.pdf]

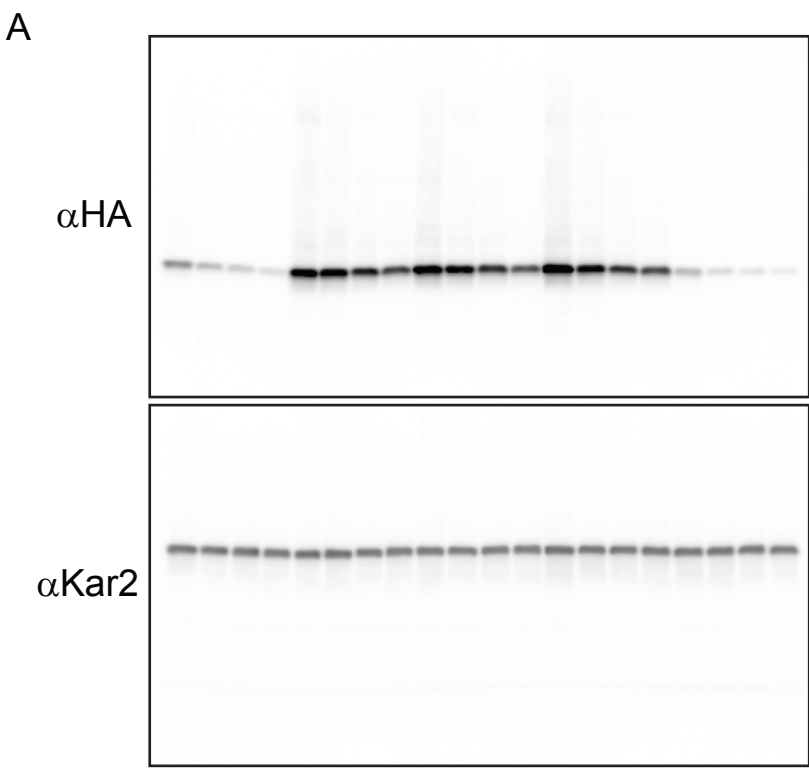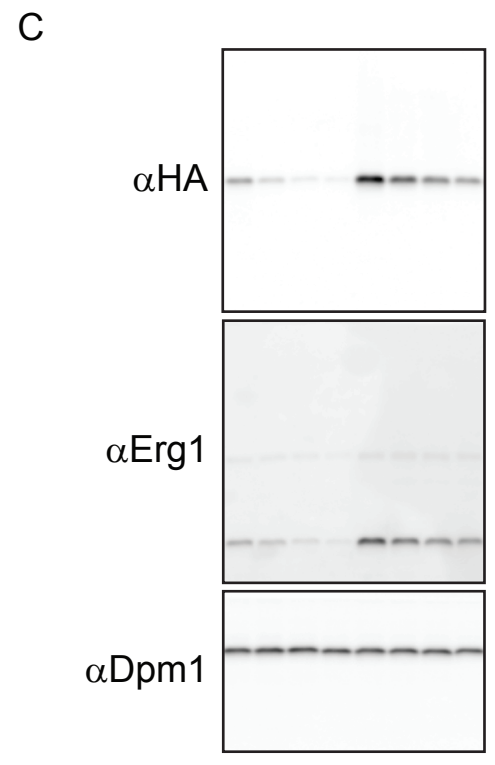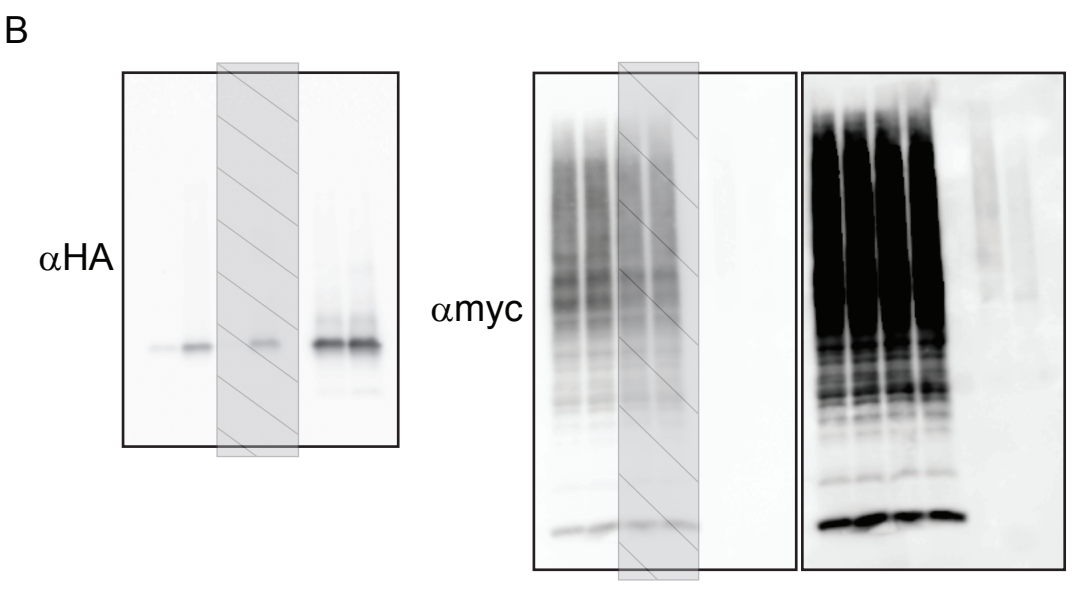

■ "IP unbound" lanes cut out in the final figure
