# Supplementary material for: Spatial control of lipid droplet proteins by the ERAD ubiquitin ligase Doa10
Source: PubMed Central journal article supplement (PMC4969576; doi:10.15252/embj.201593106), 2016-06-29
Supplement: EMBJ-35-1644-s003.pdf [file EMBJ-35-1644-s003.pdf]

D

$\alpha$ HA

$\alpha$ Dpm1

$\alpha$ Pgk1

$\alpha$ myc

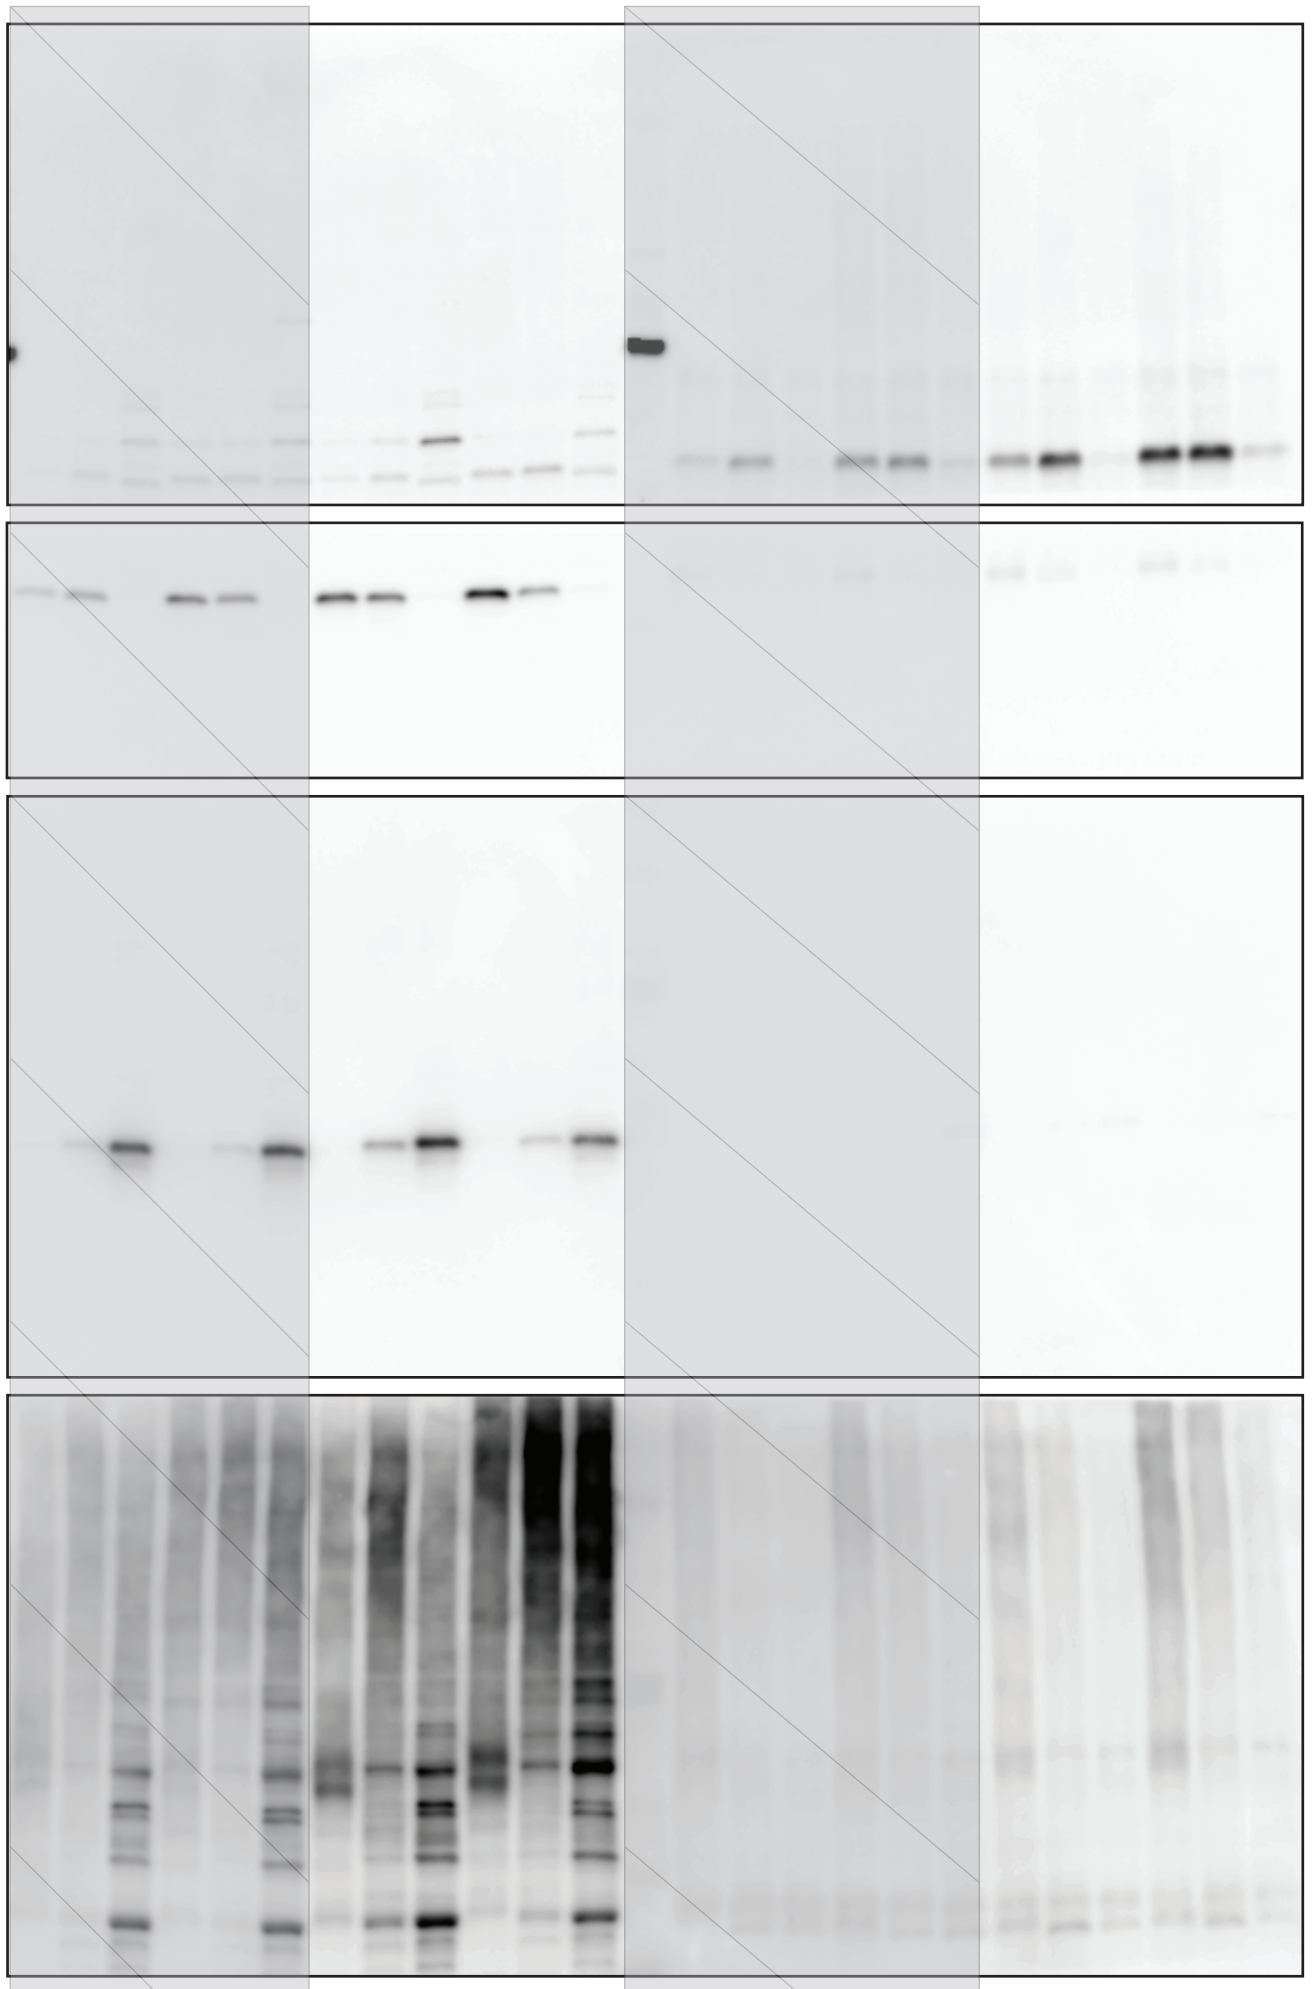

■ *CDC48-3* and corresponding *wt* lanes cut out in the final figure
