# Supplementary material for: Spatial control of lipid droplet proteins by the ERAD ubiquitin ligase Doa10
Source: PubMed Central journal article supplement (PMC4969576; doi:10.15252/embj.201593106), 2016-06-29

C

$\alpha$ HA  
(left panel)

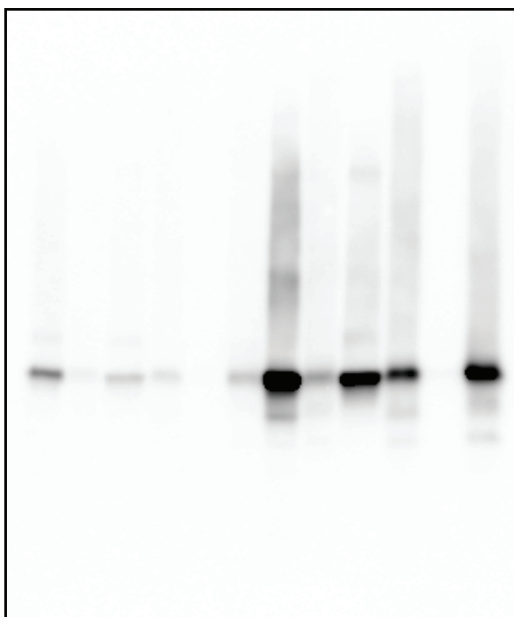

D

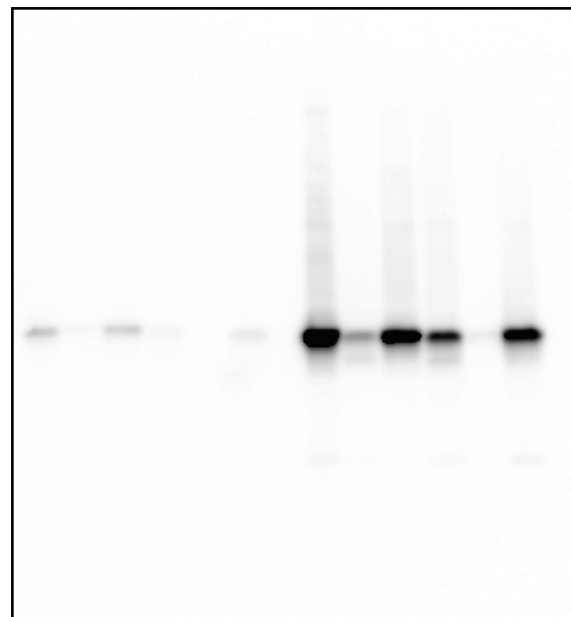

$\alpha$ HA  
(right panel)

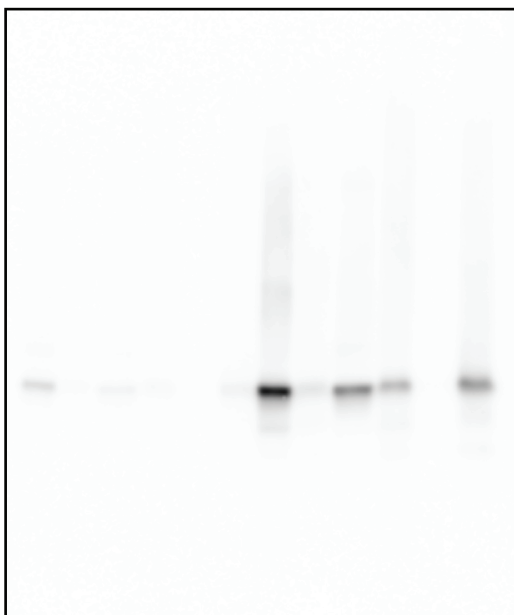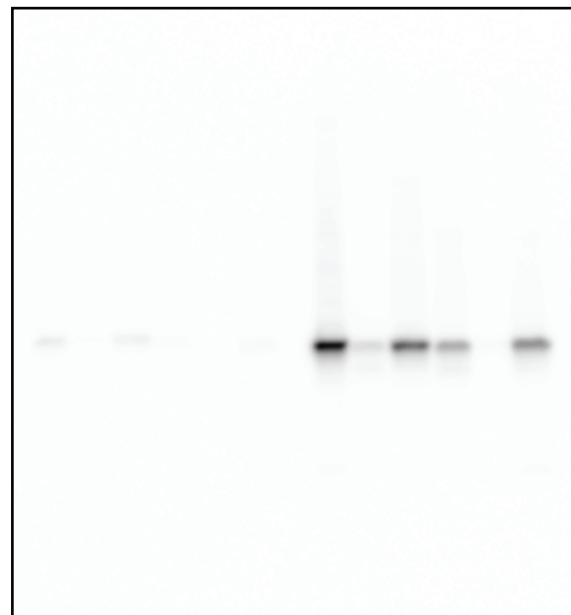

$\alpha$ Kar2

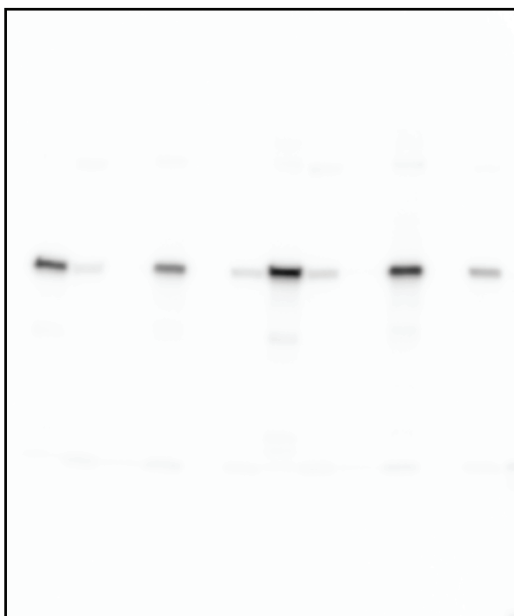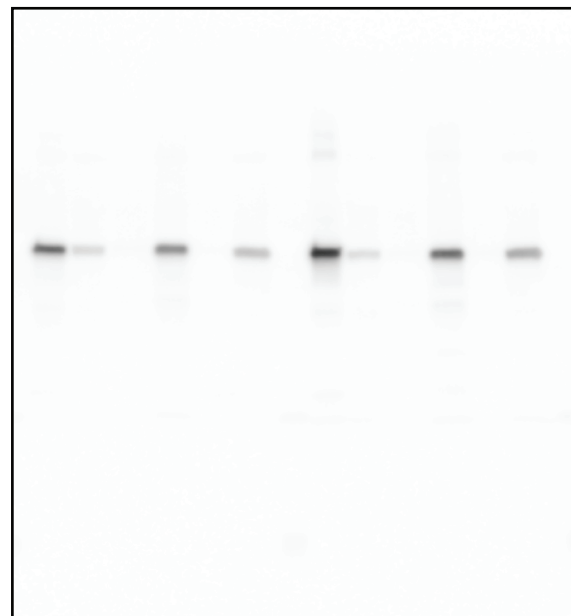

Supplement: EMBJ-35-1644-s004.pdf [file EMBJ-35-1644-s004.pdf]
